# Supplementary material
Source: PubMed Central journal article supplement (PMC2734152)
Supplement: msp096_1.pdf [file msp096_1.pdf]

## Supplemental Note S1

Plagnol and Wall (2006) considered a two-population model where there was migration between the populations, and then at some time in the past, the two populations merged into the same ancestral population. In *ms* (cf. Hudson 2002), two populations are joined (going backwards in time) using the “-ej” flag. This flag moves lineages from one population into the other population. In the version of *ms* used in Plagnol and Wall (2006) the “-ej” flag did not set the migration rate (going backwards in time) equal to zero at the time the two populations merged. Instead, the migration rate was left unchanged. The “-eM” flag would have to be used to explicitly set the migration matrix equal to zero at the time the two populations merged. Thus, in Plagnol and Wall (2006), it was assumed that all lineages were in the same ancestral population, when in reality, some of those lineages could migrate back to the other population. The net effect of this is to model population structure in the ancestral population without intending to do so. We point out that if there was no migration between the two populations at all, then the “-ej” flag would correctly move the lineages from one population to the other without allowing any migration into the second population— simply because there is no migration being allowed.

The effect that this error had on demographic parameter estimates is substantial (Table S1). In particular, the unaccounted for population structure tends to produce a skew in the frequency spectrum towards more common alleles. To counteract this, the Plagnol and Wall (2006) model estimated longer population growth (in both populations) in order for the simulated data to fit the observed frequency spectrum.

**Table S1.** Comparison of parameter estimates between Plagnol and Wall (2006) and this study.

| Parameter | Plagnol and Wall (2006) estimate | Estimate from this study |
|-----------|----------------------------------|--------------------------|
| $g_1$     | 80 Kya                           | 25 Kya                   |
| $g_2$     | 10 Kya                           | 0 Kya                    |
| $t_b$     | 60 Kya                           | 30 Kya                   |
| $b$       | 130                              | 160                      |
| $T$       | 130 Kya                          | 120 Kya                  |
| $m$       | $4 * 10^{-5}$                    | $7 * 10^{-5}$            |

**Supplemental Table S2.** Summary statistics for the actual data and for data simulated under the best-fit model. Total refers to summaries from the total sample. The middle 95% of simulated averages (based on 100 replicates of 222 loci) is given in parentheses.

|                                       | West Africans + Europeans |                       | West Africans + East Asians |                       |
|---------------------------------------|---------------------------|-----------------------|-----------------------------|-----------------------|
|                                       | Data                      | Simulations           | Data                        | Simulations           |
| $\theta_W$ , African <sup>1</sup>     | 0.88                      | 0.85 (0.82 – 0.88)    | 0.88                        | 0.88 (0.85 – 0.90)    |
| $\theta_W$ , non-African <sup>1</sup> | 0.58                      | 0.57 (0.55 – 0.60)    | 0.54                        | 0.56 (0.54 – 0.59)    |
| $\theta_W$ , total <sup>1</sup>       | 0.89                      | 0.86 (0.84 – 0.89)    | 0.88                        | 0.88 (0.86 – 0.91)    |
| $\pi$ , African <sup>2</sup>          | 0.79                      | 0.76 (0.73 – 0.79)    | 0.79                        | 0.77 (0.73 – 0.81)    |
| $\pi$ , non-African <sup>2</sup>      | 0.59                      | 0.57 (0.54 – 0.61)    | 0.55                        | 0.57 (0.54 – 0.61)    |
| $D$ , African <sup>3</sup>            | -0.47                     | -0.47 (-0.41 – -0.54) | -0.47                       | -0.51 (-0.43 – -0.60) |
| $D$ , non-African <sup>3</sup>        | -0.08                     | -0.06 (-0.17 – 0.08)  | -0.09                       | 0.02 (-0.10 – 0.13)   |
| $D$ , total <sup>3</sup>              | -0.73                     | -0.66 (-0.75 – -0.57) | -0.81                       | -0.72 (-0.81 – -0.64) |
| $\rho$ , African <sup>4</sup>         | 0.41                      | 0.44 (0.38 – 0.49)    | 0.41                        | 0.46 (0.40 – 0.52)    |
| $\rho$ , non-African <sup>4</sup>     | 0.14                      | 0.14 (0.12 – 0.15)    | 0.11                        | 0.13 (0.11 – 0.15)    |
| $F_{ST}$ <sup>5</sup>                 | 0.15                      | 0.17 (0.16 – 0.18)    | 0.16                        | 0.16 (0.15 – 0.18)    |

<sup>1</sup> cf. Watterson (1975). Average value per Kb.

<sup>2</sup> cf. Tajima (1983). Average value per Kb.

<sup>3</sup> cf. Tajima (1989). Average value per locus.

<sup>4</sup> cf. Hudson (2001). Median estimated value (across loci) per Kb.

<sup>5</sup> Average value across loci.

**Supplemental Table S3.** List of loci with significant S\* values

| European    | Yoruba (w/Europe) | East Asia  | Yoruba (w/E. Asia) |
|-------------|-------------------|------------|--------------------|
| Locus name  | Locus name        | Locus name | Locus name         |
| abl2 *      | abcb1 **          | abl2 *     | abcb1 **           |
| adh1c *     | anapc10 **        | adh1b *    | anapc10 **         |
| adh5 *      | angpt17 *         | atrx *     | apex2 *            |
| atrx *      | apex2 *           | blm *      | atrx **            |
| birc2 **    | atrx *            | ccl5 *     | birc2 *            |
| chrna4 *    | capn3 *           | cdk5r2 **  | casp5 *            |
| fdxr *      | casp5 *           | cyp1a2 *   | cyp1a1 *           |
| fgf5 *      | ctnna1 **         | ddit3 *    | dut **             |
| fmo5 *      | cyp1a1 *          | esrra *    | fancd2 *           |
| gsta4 *     | dut **            | fancf *    | fmo4 *             |
| hspa2 *     | fancd2 *          | fdxr *     | gab1 *             |
| ncoa3 *     | fmo4 *            | hspa2 *    | hspa9b *           |
| oxr1 ***    | oxsr1 *           | map2k4 *   | mapk1 *            |
| rpa3 *      | prdx2 *           | mapk1 *    | msh5 *             |
| rrm2b **    | prdx3 *           | mmp11 *    | oxsr1 *            |
| scara3 *    | prkd1 *           | mmp8 *     | prdx2 *            |
| sepp1 *     | rad51l1 *         | ncoa3 **   | recql4 *           |
| tp53bp1 *** | tdp1 *            | oxr1 **    | rrm2b *            |
| tp53i3 *    | tert *            | oxsr1 *    | spo11 *            |
| tuba2 **    | tjp1 *            | rad1 **    | tdp1 **            |

---

|        |           |             |          |
|--------|-----------|-------------|----------|
| vnn2 * | tpo *     | rpa3 **     | tert *   |
|        | trex2 *   | scara3 *    | tjp1 **  |
|        | xrcc4 *** | sepp1 *     | trex2 *  |
|        |           | sirt1 *     | ucp2 *   |
|        |           | smarcb1 *   | xrcc4 ** |
|        |           | tbx1 *      |          |
|        |           | tp53bp1 *** |          |
|        |           | tp53i3 *    |          |
|        |           | ube2v2 *    |          |
|        |           | vnn2 *      |          |

---

\* p < 0.05

\*\* p < 0.01

\*\*\* p < 0.002

**Supplemental Table S4a.** Estimated parameter values for the profile likelihood curve for  $a$  for the Yoruba-European simulations.  $g_1$ ,  $g_2$ ,  $t_b$  and  $T$  are given in units of 1,000 years ago. Likelihoods were estimated using  $5 * 10^6$  replicates.

| $a$  | $g_1$ | $g_2$ | $t_b$ | $b$ | $T$ | $m$   | Lik      | Non-Afr<br>S* p-value | Afr.<br>S* p-value |
|------|-------|-------|-------|-----|-----|-------|----------|-----------------------|--------------------|
| 0    | 25    | 0     | 30    | 160 | 120 | 7e-05 | -860.054 | $4.81 * 10^{-3}$      | $2.12 * 10^{-8}$   |
| 0.02 | 25    | 0     | 30    | 160 | 100 | 7e-05 | -858.255 | $4.29 * 10^{-2}$      | $5.95 * 10^{-9}$   |
| 0.04 | 25    | 0     | 30    | 160 | 100 | 7e-05 | -857.136 | > 0.1                 | $2.85 * 10^{-9}$   |
| 0.06 | 30    | 0     | 30    | 180 | 80  | 7e-05 | -856.295 | > 0.1                 | $1.61 * 10^{-9}$   |
| 0.08 | 30    | 0     | 30    | 160 | 80  | 7e-05 | -855.456 | > 0.1                 | $2.38 * 10^{-11}$  |
| 0.1  | 35    | 0     | 35    | 200 | 60  | 7e-05 | -854.834 | > 0.1                 | $9.93 * 10^{-11}$  |
| 0.12 | 35    | 0     | 35    | 200 | 60  | 7e-05 | -854.053 | > 0.1                 | $8.63 * 10^{-11}$  |
| 0.14 | 35    | 0     | 35    | 200 | 60  | 7e-05 | -853.687 | > 0.1                 | $2.18 * 10^{-11}$  |
| 0.16 | 35    | 0     | 35    | 200 | 60  | 7e-05 | -854.163 | > 0.1                 | $2.25 * 10^{-11}$  |
| 0.18 | 35    | 0     | 35    | 200 | 60  | 7e-05 | -854.765 | > 0.1                 | $7.23 * 10^{-12}$  |
| 0.2  | 35    | 0     | 35    | 200 | 60  | 7e-05 | -855.571 | > 0.1                 | $9.69 * 10^{-12}$  |
| 0.22 | 40    | 0     | 40    | 220 | 60  | 7e-05 | -857.094 | > 0.1                 |                    |

**Supplemental Table S4b.** Estimated parameter values for the profile likelihood curve for  $a$  for the Yoruba-East Asian simulations.  $g_1$ ,  $g_2$ ,  $t_b$  and  $T$  are given in units of 1,000 years ago. Likelihoods were estimated using  $5 * 10^6$  replicates.

| $a$   | $g_1$ | $g_2$ | $t_b$ | $b$ | $T$ | $m$   | Lik      | Non-Afr<br>S* p-value | Afr.<br>S* p-value |
|-------|-------|-------|-------|-----|-----|-------|----------|-----------------------|--------------------|
| 0     | 35    | 0     | 30    | 160 | 80  | 5e-05 | -827.279 | $4.21 * 10^{-4}$      | $1.62 * 10^{-12}$  |
| 0.005 | 35    | 0     | 30    | 180 | 60  | 5e-05 | -823.459 | $3.46 * 10^{-4}$      | $1.14 * 10^{-10}$  |
| 0.01  | 35    | 0     | 30    | 180 | 60  | 5e-05 | -821.946 | $6.57 * 10^{-3}$      | $2.54 * 10^{-11}$  |
| 0.015 | 40    | 0     | 30    | 180 | 60  | 5e-05 | -821.875 | $2.27 * 10^{-2}$      | $1.18 * 10^{-11}$  |
| 0.02  | 40    | 0     | 30    | 180 | 60  | 5e-05 | -822.522 | > 0.1                 | $2.03 * 10^{-11}$  |
| 0.025 | 40    | 0     | 30    | 180 | 60  | 5e-05 | -824.133 | > 0.1                 | $1.12 * 10^{-11}$  |
| 0.03  | 40    | 0     | 30    | 180 | 60  | 5e-05 | -826.424 | > 0.1                 | $4.71 * 10^{-12}$  |

## Supplemental Note S5

We present ms command lines used for producing simulated 25 Kb regions under our best-fit models. Briefly, the `-t` flag specifies  $\theta$ , `-r` specifies  $\rho$ , `-l` specifies the migration rate, `-g` and `-eg` specify growth parameters, `-en` specifies bottleneck parameters, and `-ej` and `-eM` specify the population split time. Time is scaled in units of  $4N_0$  generations, which corresponds to  $10^8$  years. For further details, please see Hudson (2002).

The ms command line for simulating a 25 Kb region under the best-fit model without ancient admixture ( $a = 0$ ) for the West African – European data is

```
ms 68 1 -t 1744.1 -r 627.9 25000 -l 2 24 44 280 -g 1 18420.7 -n 2 0.01 -eg 0.00025 1 0. -en 0.0003 2 6.25e-05 -en 0.00031 2 0.01 -ej 0.0012 2 1 -eM 0.0012 0
```

The ms command line for simulating a 25 Kb region under the best-fit model with ancient admixture ( $a = 0.14$ ) for the West African – European data is

```
ms 68 1 -t 1719.5 -r 619. 25000 -l 2 24 44 280 -g 1 13157.6 -n 2 0.01 -eg 0.00035 1 0. -en 0.00035 2 5e-05 -en 0.00036 2 0.01 -es 0.0005 2 0.86 -en 0.0005 3 0.01 -ej 0.0006 2 1 -eM 0.0006 0 -ej 0.004 3 1
```

The ms command line for simulating a 25 Kb region under the best-fit model without ancient admixture ( $a = 0$ ) for the West African – East Asian data is

```
ms 72 1 -t 1802.8 -r 649.0 25000 -l 2 24 48 200 -g 1 13157.6 -n 2 0.01 -eg 0.00035 1 0. -en 0.0003 2 6.25e-05 -en 0.00031 2 0.01 -ej 0.0008 2 1 -eM 0.0008 0
```

The ms command line for simulating a 25 Kb region under the best-fit model with ancient admixture ( $a = 0.015$ ) for the West African – East Asian data is

```
ms 72 1 -t 1750.1 -r 630.0 25000 -l 2 24 48 200 -g 1 11512.9 -n 2 0.01 -eg 0.0004 1 0. -en 0.0003 2 5.556e-05 -en 0.00031 2 0.01 -es 0.0005 2 0.985 -en 0.0005 3 0.01 -ej 0.0006 2 1 -eM 0.0006 0 -ej 0.016 3 1
```
